# Supplementary material for: Quantitative Evaluation of COVID-19 Pneumonia CT Using AI Analysis—Feasibility and Differentiation from Other Common Pneumonia Forms
Source: MDPI journal article supplement (doi:10.3390/diagnostics13122129), 2023-06-20
Supplement: s1 [file s1]

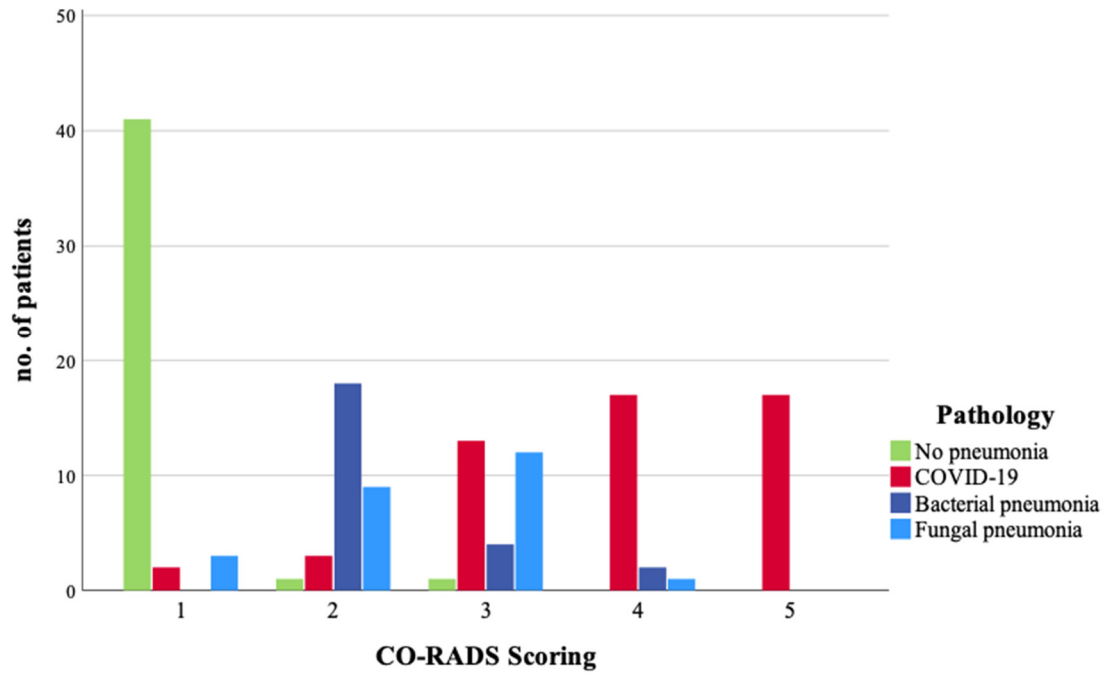

**Figure S1.** Distribution of CO-RADS scores separated into the different pneumonia forms.

**Table S1.** Mean CO-RADS scores separated into the different pneumonia forms.

|                             | COVID-19 | Bacterial pneumonia | Fungal pneumonia | No pneumonia |
|-----------------------------|----------|---------------------|------------------|--------------|
| Mean CO-RADS Score $\pm$ SD | 4 $\pm$  | 2 $\pm$ 1           | 2 $\pm$ 1        | 1 $\pm$ 0    |

While neglecting the individual entities of bacterial, fungal and COVID-19 pneumonia, an overall positive correlation between CO-RADS Score and Total Opacity Score ( $r = .83$ ,  $p < 0.001$ ) was registered, as can be seen in the next figure. Furthermore, a significant correlation between Percentage of Opacity ( $r = .83$ ,  $p < .001$ ) and Percentage of High Opacity ( $r = .78$ ,  $p < 0.001$ ) and CO-RADS classification was present. Including patients with COVID-19 pneumonia only, the correlation between CO-RADS Score and Total Opacity Score were  $r = .51$ ,  $p < .001$ ,  $r = 0.56$ ,  $p < 0.001$  for Percentage of Opacity and  $r = .5$ ,  $p < 0.001$  for Percentage of High Opacity, respectively. Radiological scoring does not correlate with the value of COVID-19 probability calculated by CT Pneumonia Analysis (spearman correlation coefficient is  $r = .18$ ,  $p = 0.16$ .)

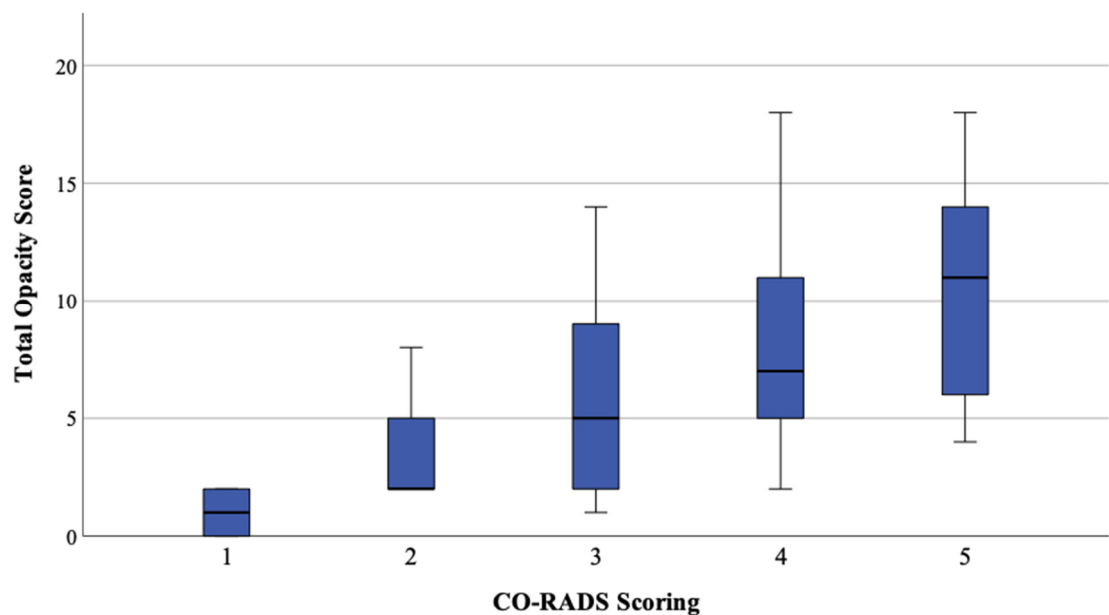

**Figure S2.** Distribution of mean total opacity score in different CO-RADS subgroups.

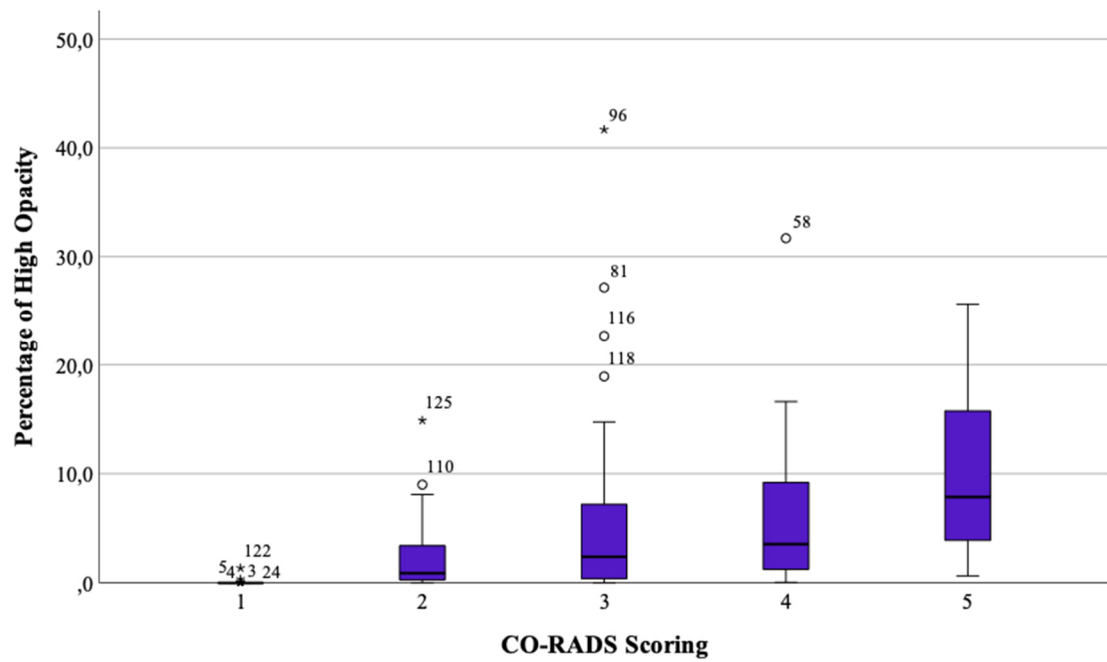

**Figure S3.** Percentage of High Opacity areas distributed to different CO-RADS subgroups/classification.

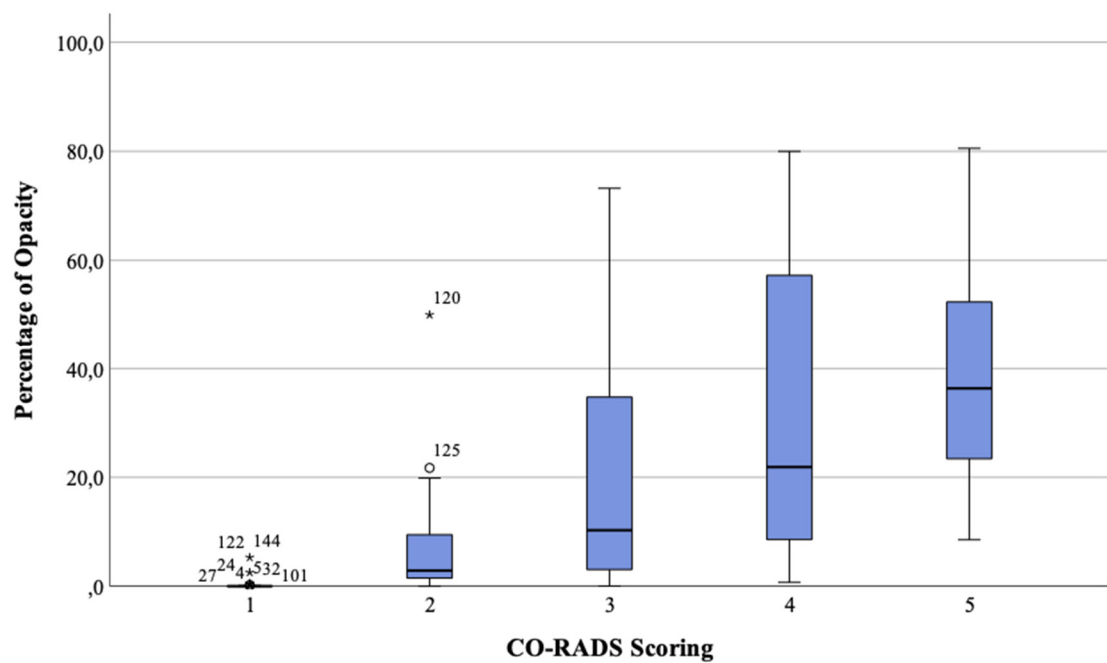

**Figure S4.** Percentage of Opacity areas distributed to different CO-RADS subgroups/classification.
